# Supplementary material
Source: publisher figshare collection journal article supplement (https://acs.figshare.com/ndownloader/files/14579621)
Supplement: Supplementary file 1 [file 14579621]

# Odd-Even Effect on Rotational Dynamics of Spin-Labeled Polyacid Chain Segments in Polyelectrolyte Multilayers

Uwe Lappan\*, Cindy Rau, Carolin Naas, Ulrich Scheler

Leibniz-Institut für Polymerforschung Dresden e. V., Hohe Straße 6, 01069 Dresden, Germany

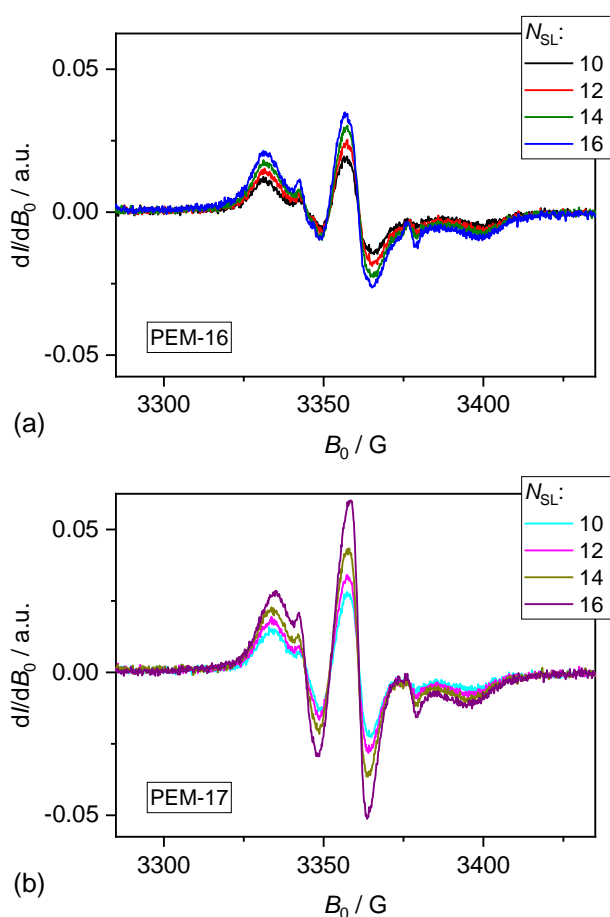

**Figure S1.** EPR spectra of PAH/P(E-*alt*-MA) multilayers with SL-P(E-*alt*-MA) placed in a selected layer ( $N_{SL}$ ), prepared and swollen in buffer solution of pH 4, and measured 6 day after preparation at room temperature. The PEMs consist of (a) 16 layers and (b) 17 layers.

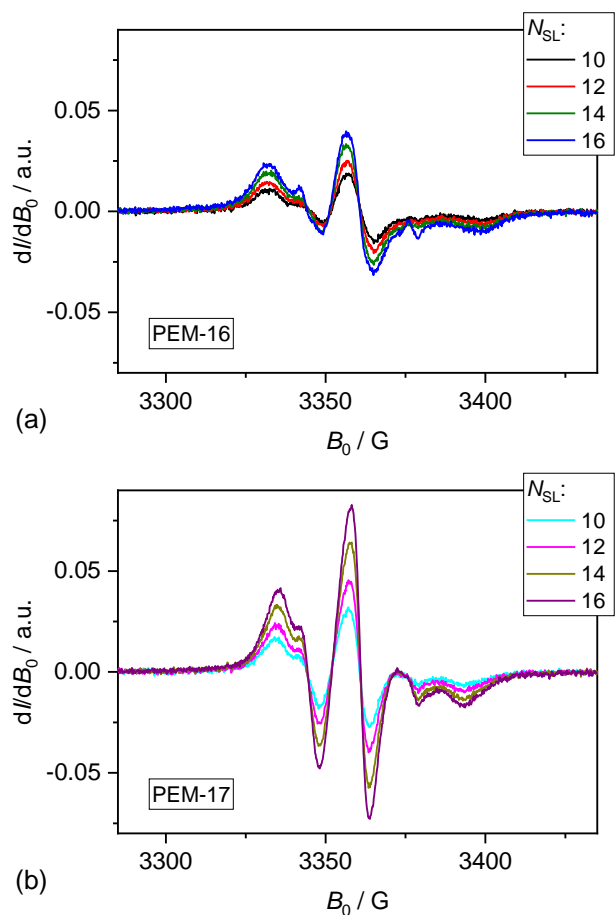

**Figure S2.** EPR spectra of PAH/P(E-*alt*-MA) multilayers with SL-P(E-*alt*-MA) placed in a selected layer ( $N_{SL}$ ), prepared and swollen in buffer solution of pH 5, and measured 6 day after preparation at room temperature. The PEMs consist of (a) 16 layers and (b) 17 layers.

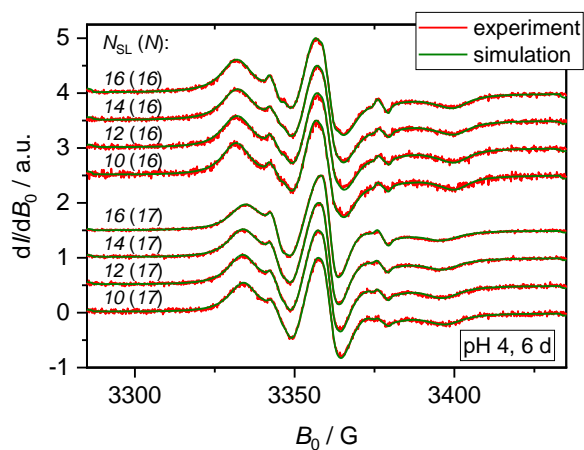

**Figure S3.** Experimental and simulated EPR spectra of PAH/P(E-*alt*-MA) multilayers with SL-P(E-*alt*-MA) placed in a selected layer ( $N_{SL}$ ), prepared and swollen in buffer solution of pH 4, and measured 6 days after preparation at room temperature. The number of layers  $N$  in the PEMs is indicated in brackets. The spectra are normalized to the value of the maximum height of the middle-field line.

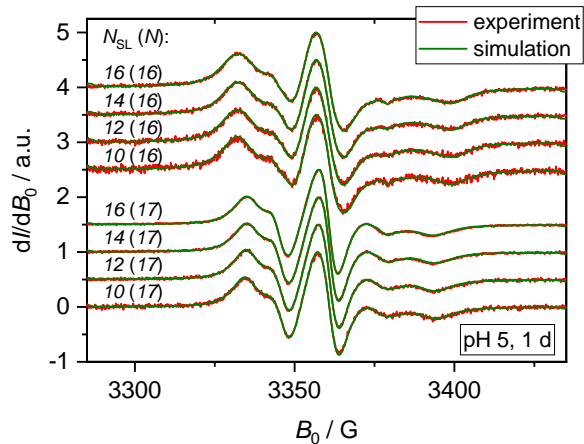

**Figure S4.** Experimental and simulated EPR spectra of PAH/P(E-*alt*-MA) multilayers with SL-P(E-*alt*-MA) placed in a selected layer ( $N_{SL}$ ), prepared and swollen in buffer solution of pH 5, and measured 1 day after preparation at room temperature. The number of layers  $N$  in the PEMs is indicated in brackets. The spectra are normalized to the value of the maximum height of the middle-field line.

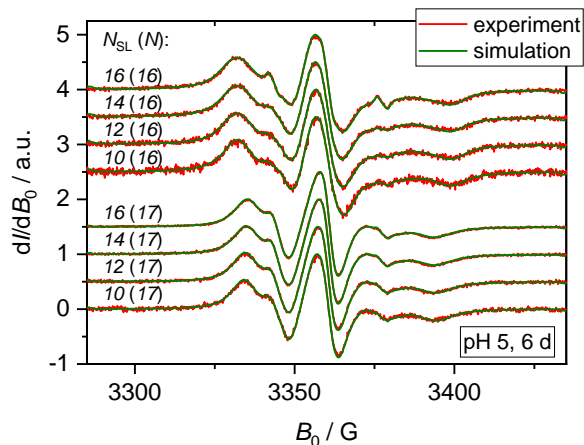

**Figure S5.** Experimental and simulated EPR spectra of PAH/P(E-*alt*-MA) multilayers with SL-P(E-*alt*-MA) placed in a selected layer ( $N_{SL}$ ), prepared and swollen in buffer solution of pH 5, and measured 6 days after preparation at room temperature. The number of layers  $N$  in the PEMs is indicated in brackets. The spectra are normalized to the value of the maximum height of the middle-field line.

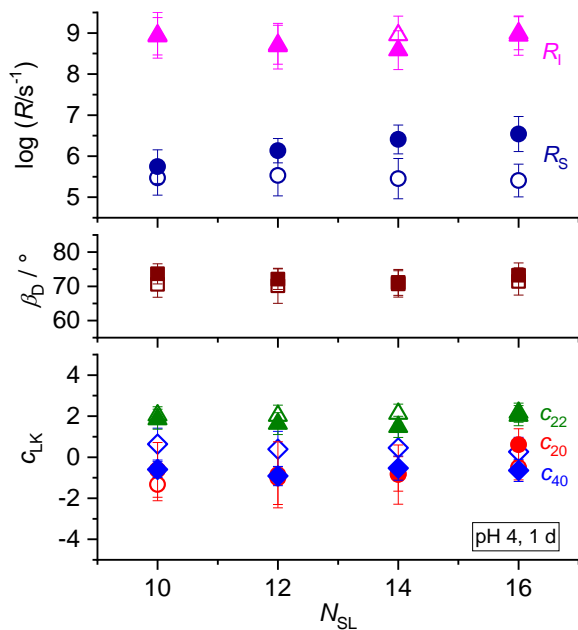

**Figure S6.** Rotational diffusion coefficients  $R_S$  and  $R_I$ , diffusion tilt angle  $\beta_D$ , and orienting potential coefficients  $c_{20}$ ,  $c_{22}$  and  $c_{40}$  of the main component in PAH/P(E-*alt*-MA) multilayers with SL-P(E-*alt*-MA) placed in a selected layer, prepared and swollen in buffer solution of pH 4, and measured 1 day after preparation at room temperature as a function of the place  $N_{SL}$  of the SL-P(E-*alt*-MA).

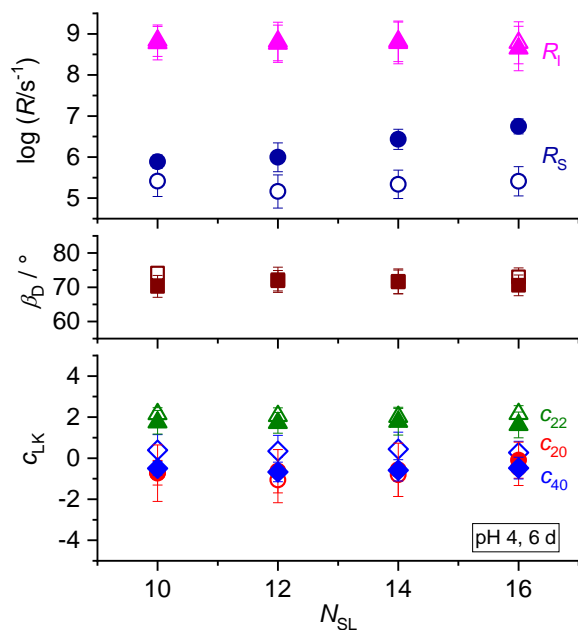

**Figure S7.** Rotational diffusion coefficients  $R_S$  and  $R_I$ , diffusion tilt angle  $\beta_D$ , and orienting potential coefficients  $c_{20}$ ,  $c_{22}$  and  $c_{40}$  of the main component in PAH/P(E-*alt*-MA) multilayers with SL-P(E-*alt*-MA) placed in a selected layer, prepared and swollen in buffer solution of pH 4, and measured 6 days after preparation at room temperature as a function of the place  $N_{SL}$  of the SL-P(E-*alt*-MA).

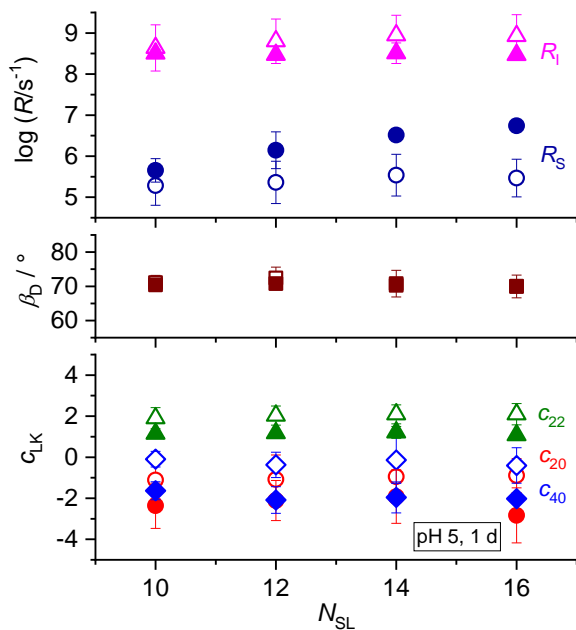

**Figure S8.** Rotational diffusion coefficients  $R_S$  and  $R_I$ , diffusion tilt angle  $\beta_D$ , and orienting potential coefficients  $c_{20}$ ,  $c_{22}$  and  $c_{40}$  of the main component in PAH/P(E-*alt*-MA) multilayers with SL-P(E-*alt*-MA) placed in a selected layer, prepared and swollen in buffer solution of pH 5, and measured 1 day after preparation at room temperature as a function of the place  $N_{SL}$  of the SL-P(E-*alt*-MA).

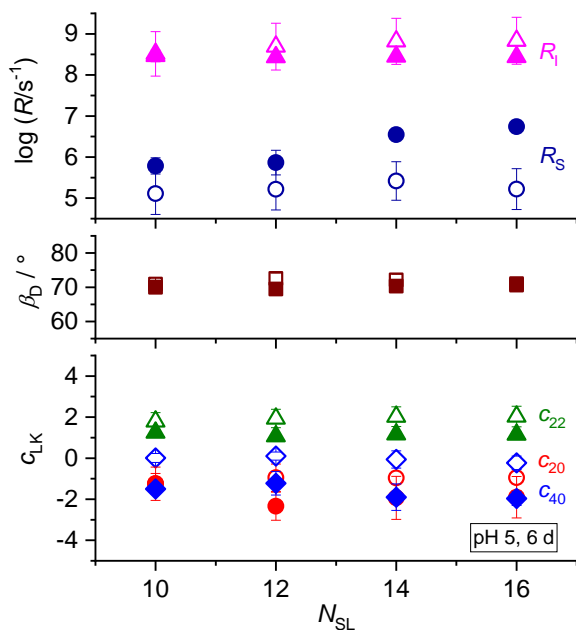

**Figure S9.** Rotational diffusion coefficients  $R_S$  and  $R_I$ , diffusion tilt angle  $\beta_D$ , and orienting potential coefficients  $c_{20}$ ,  $c_{22}$  and  $c_{40}$  of the main component in PAH/P(E-*alt*-MA) multilayers with SL-P(E-*alt*-MA) placed in a selected layer, prepared and swollen in buffer solution of pH 5, and measured 6 days after preparation at room temperature as a function of the place  $N_{SL}$  of the SL-P(E-*alt*-MA).
